# Supplementary material
Source: PubMed Central journal article supplement (PMC5117811)
Supplement: NIHMS807910-supplement-2.pdf [file NIHMS807910-supplement-2.pdf]

## **SUPPLEMENTARY INFORMATION**

### **Design and Characterization of Bivalent BET Inhibitors**

Minoru Tanaka<sup>1,2,#</sup>, Justin M. Roberts<sup>1,#</sup>, Hyuk-Soo Seo<sup>3</sup>, Amanda Souza<sup>1</sup>, Joshiawa Paulk<sup>1</sup>, Thomas G. Scott<sup>1</sup>, Stephen L. DeAngelo<sup>1,3</sup>, Sirano Dhe-Paganon<sup>3</sup>, and James E. Bradner<sup>1,2,4</sup>

<sup>1</sup>Department of Medical Oncology, Dana-Farber Cancer Institute, 450 Brookline Avenue, Boston, Massachusetts 02215, USA.

<sup>2</sup>Department of Medicine, Harvard Medical School, 25 Shattuck Street, Boston, Massachusetts 02115, USA.

<sup>3</sup>Department of Cancer Biology, Dana-Farber Cancer Institute, 450 Brookline Avenue, Boston, Massachusetts 02215, USA.

<sup>4</sup>Novartis Institutes for Biomedical Research, Cambridge, Massachusetts 02139, USA

#These authors contributed equally to this work.

\*Corresponding author

E-mail: james\_bradner@dfci.harvard.edu

## SUPPLEMENTARY RESULTS

**a**

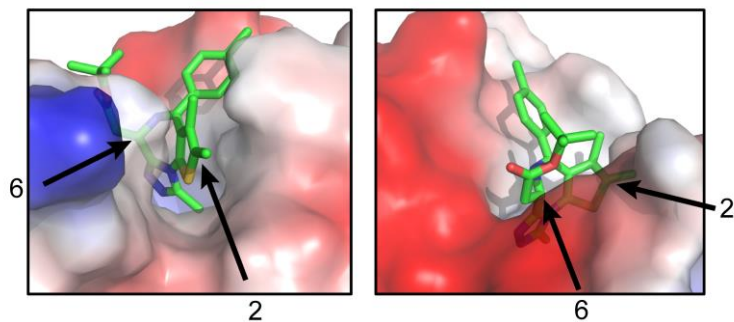

**b**

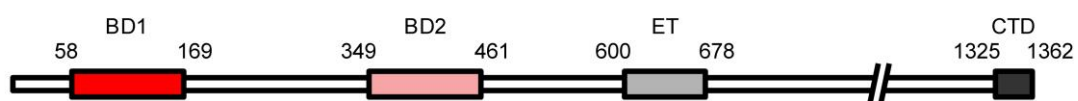

**Supplementary Figure 1 | Structural basis of bivalent BET inhibitor design.** (a) Crystal structure of BRD4(1) with JQ1 (PDB: 3MXF). Positions amenable to chemical modification are indicated by arrows. (b) Primary structure of human BRD4 with domains shown.

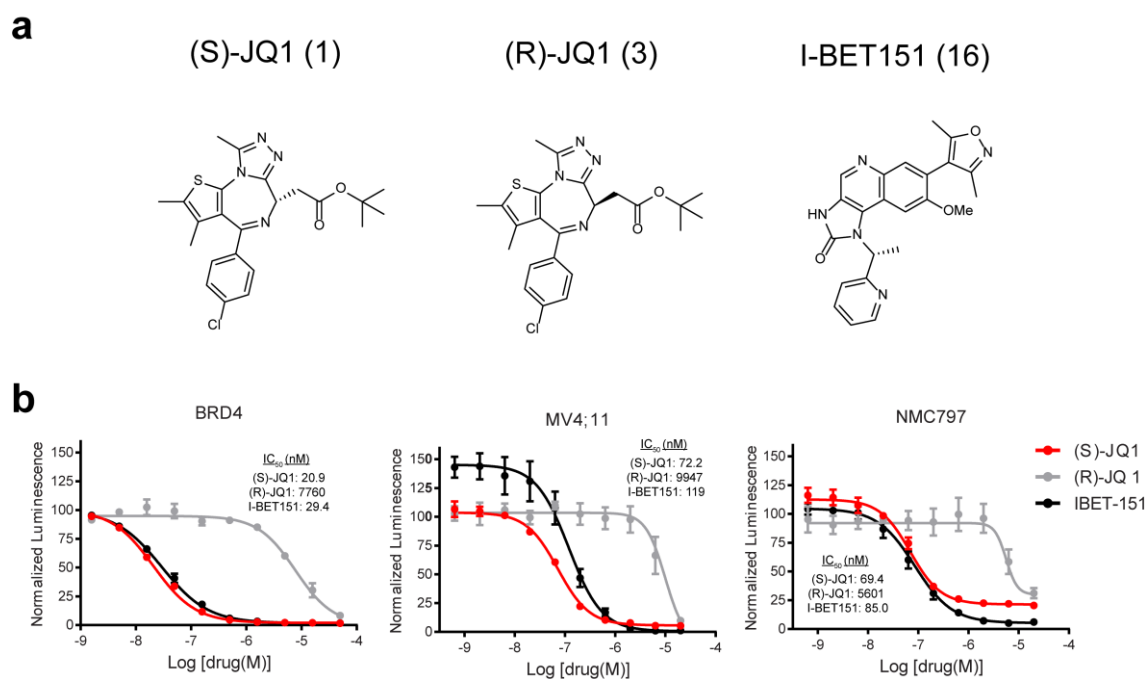

**Supplementary Figure 2 | Activities of (S)- and (R)-JQ1 and I-BET151. (a)** Chemical representation of the *S* and *R* enantiomers of JQ1 and I-BET151. **(b)** Biochemical and cellular activities of the *S* and *R* enantiomers of JQ1 and I-BET151. Biochemical and cellular data points represent the mean of at least 2 or 4 replicates respectively  $\pm$  SD.

**a**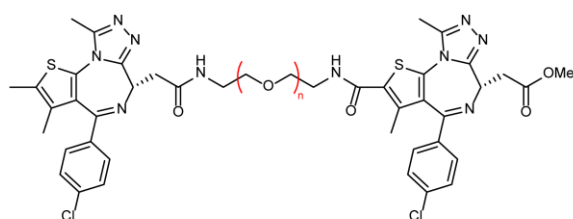**b**

| ID                | n | Properties |       |      | Alpha: IC <sub>50</sub> (nM) |         | BROMOscan; K <sub>d</sub> (nM) |         |           |            |           | Cell; IC <sub>50</sub> (nM) |       |
|-------------------|---|------------|-------|------|------------------------------|---------|--------------------------------|---------|-----------|------------|-----------|-----------------------------|-------|
|                   |   | MW         | cLogP | tPSA | BRD4(1)                      | BRDT(1) | BRD4(1)                        | BRD4(2) | BRD4(1,2) | BRD4(full) | BRDT(1,2) | NMC797                      | MV411 |
| (6S+2S)-PEG0 (6)  | 0 | 870        | 4.9   | 165  | 3.58                         | 2.36    | 0.034                          | NT      | 0.047     | NT         | NT        | 0.736                       | 0.358 |
| (6S+2S)-PEG1 (7)  | 1 | 914        | 5.0   | 174  | 0.758                        | 0.574   | 0.01                           | 0.024   | 0.0047    | 0.013      | 0.039     | 1.15                        | 0.236 |
| (6S+2S)-PEG2 (8)  | 2 | 958        | 4.8   | 184  | 1.28                         | 1.84    | 0.014                          | NT      | 0.0091    | NT         | NT        | 1.06                        | 0.216 |
| (6S+2S)-PEG3 (9)  | 3 | 1002       | 4.6   | 193  | 2.25                         | 0.878   | 0.029                          | NT      | 0.0075    | NT         | NT        | 0.704                       | 0.308 |
| (6S+2S)-PEG4 (10) | 4 | 1046       | 4.4   | 202  | 2.95                         | 1.09    | 0.023                          | NT      | 0.0066    | NT         | NT        | 1.39                        | 0.998 |
| (6S+2S)-PEG7 (11) | 7 | 1178       | 3.9   | 230  | 0.789                        | 1.59    | 0.026                          | NT      | 0.0059    | NT         | NT        | 0.614                       | 2.559 |

**c**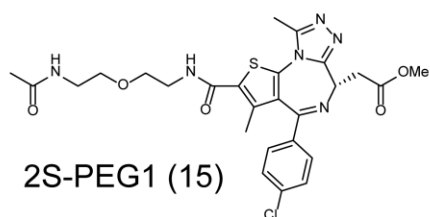

**Supplementary Figure 3 | SAR of (6+2)-PEG analogs.** (a) Chemical representation of (6+2)-PEG analogs with different linker lengths (n). (b) SAR properties of (6+2)-PEG analogs including molecular weight (MW), logarithm of the partition coefficient (cLogP), the total polar surface area (tPSA) and biochemical and cellular potencies. (c) Chemical structure of single warhead with PEG1 linker (2S-PEG1). NT: not tested.

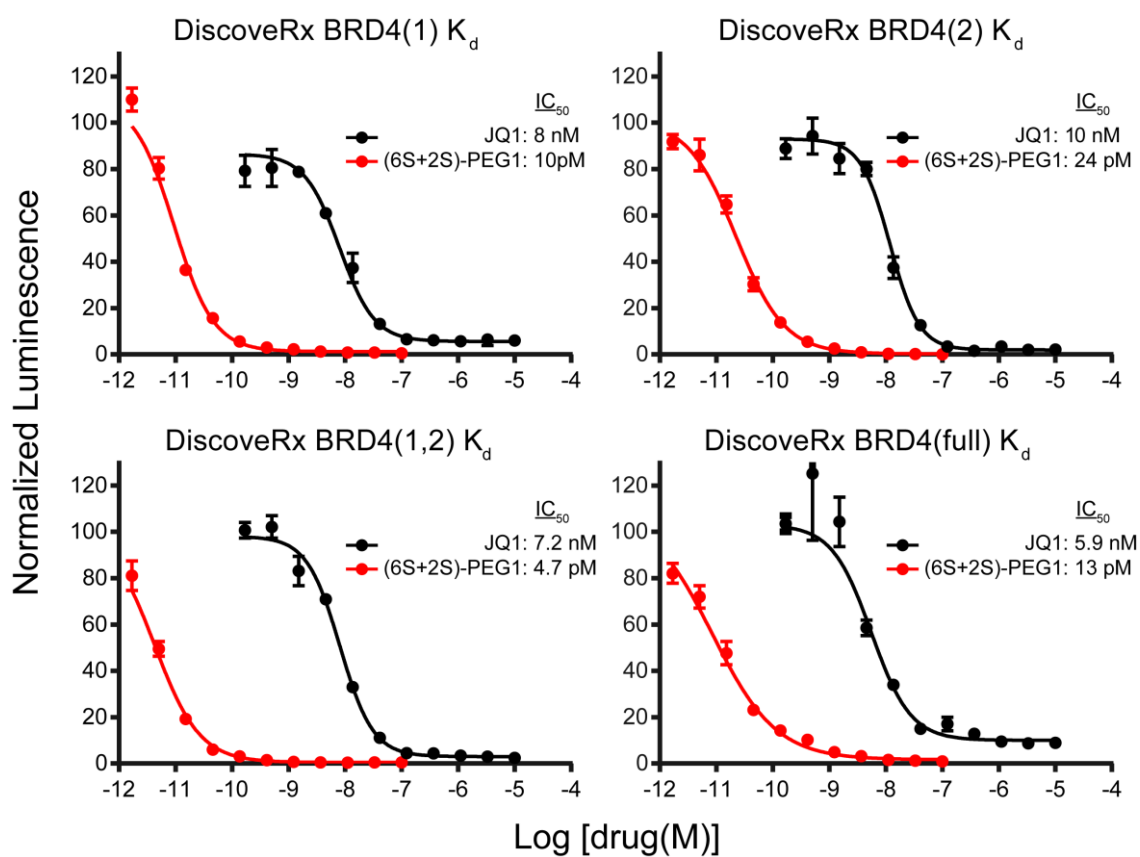

**Supplementary Figure 4 | BROMOscan™ of (6S+2S)-PEG1 and JQ1.** (a) Potency of hetero-dimeric compounds was evaluated by BROMOscan™ (DiscoverX). Data points represent the mean of 2 replicates  $\pm$  SD.

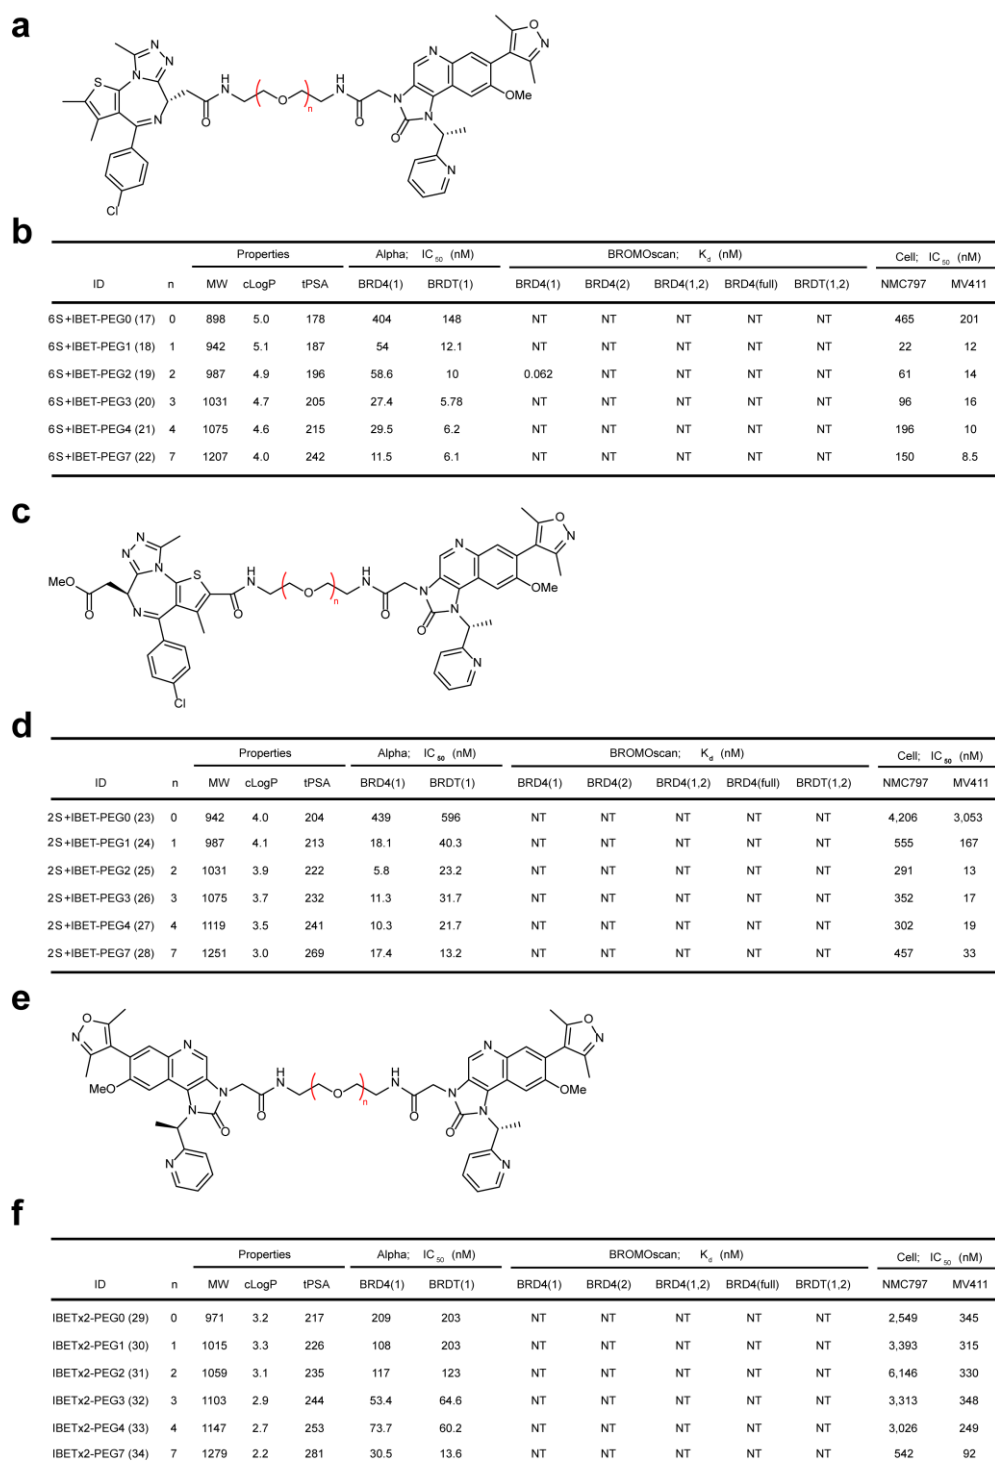

**Supplementary Figure 5 | SAR of hetero- and homo-dimers of I-BET151 and JQ1. (a, c, e) Chemical representation of hetero- and homo-dimers of I-BET151 and JQ1 with different linker lengths (n). (b, d, f) SAR properties of hetero- and homo-dimers of I-BET151 and JQ1 including molecular weight (MW), logarithm of the partition coefficient (cLogP), the total polar surface area (tPSA) and biochemical and cellular potencies. NT: not tested.**

**a**

**(6S+2S)-PEG1**      **(6S+2S)-PEG2**  
 BRD4(1): 0.758 nM      BRD4(1): 1.28 nM  
 NMC797: 1.15 nM      NMC797: 1.06 nM  
 MV4;11: 0.236 nM      MV4;11: 0.216 nM

**(6S+2S)-PEG3**      **(6S+2S)-PEG4**  
 BRD4(1): 2.25 nM      BRD4(1): 2.95 nM  
 NMC797: 0.704 nM      NMC797: 1.39 nM  
 MV4;11: 0.308 nM      MV4;11: 0.998 nM

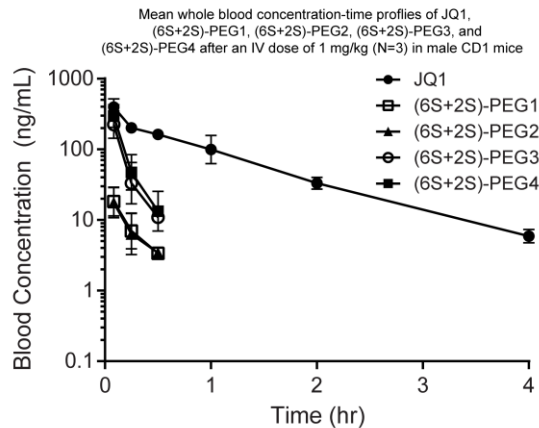

| Pharmacokinetic parameters of JQ1, (6S+2S)-PEG1, (6S+2S)-PEG2, (6S+2S)-PEG3 and (6S+2S)-PEG4 after IV administration at 1 mg/kg in male CD1 mice |            |                         |       |              |              |              |              |
|--------------------------------------------------------------------------------------------------------------------------------------------------|------------|-------------------------|-------|--------------|--------------|--------------|--------------|
| Dose (mg/kg)                                                                                                                                     | Dose route | PK parameters (unit)    | JQ1   | (6S+2S)-PEG1 | (6S+2S)-PEG2 | (6S+2S)-PEG3 | (6S+2S)-PEG4 |
| 1                                                                                                                                                | IV<br>N=3  | CL (L/hr/kg)            | 3.34  | 112          | 115          | 10.5         | 10.9         |
|                                                                                                                                                  |            | $V_{ss}$ (L/kg)         | 3.01  | 20.7         | 22.1         | 0.974        | 0.877        |
|                                                                                                                                                  |            | $AUC_{last}$ (hr*ng/mL) | 307   | 4.98         | 4.90         | 59.7         | 78.7         |
|                                                                                                                                                  |            | $AUC_{INF}$ (hr*ng/mL)  | 313   | 8.93         | 8.68         | 95.4         | 97.0         |
|                                                                                                                                                  |            | Terminal $t_{1/2}$ (hr) | 0.788 | 0.137        | 0.141        | 0.0835       | 0.0857       |
|                                                                                                                                                  |            | $MRT_{INF}$ (hr)        | 0.897 | 0.185        | 0.192        | 0.0930       | 0.0850       |

**b**

**(6S+2S)-PEG0**      **(6S+2S)-PEG7**  
 BRD4(1): 3.58 nM      BRD4(1): 0.789 nM  
 NMC797: 0.736 nM      NMC797: 0.614 nM  
 MV4;11: 0.358 nM      MV4;11: 2.56 nM

**(6S+6S)-PEG7**      **(6S+2S)-PEG1-pCN**  
 BRD4(1): 3.09 nM      BRD4(1): 0.462 nM  
 NMC797: 0.792 nM      NMC797: 5.76 nM  
 MV4;11: 0.170 nM      MV4;11: 1.38 nM

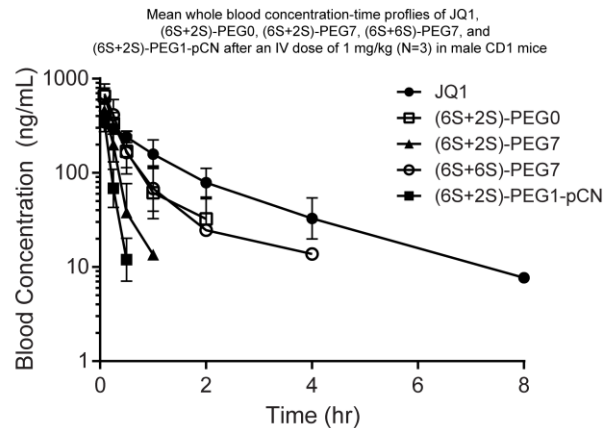

| Pharmacokinetic parameters of JQ1, (6S+2S)-PEG0, (6S+2S)-PEG7, (6S+6S)-PEG7, (6S+2S)-PEG1-pCN after IV administration at 1 mg/kg in male CD1 mice |            |                         |      |              |              |              |                  |
|---------------------------------------------------------------------------------------------------------------------------------------------------|------------|-------------------------|------|--------------|--------------|--------------|------------------|
| Dose (mg/kg)                                                                                                                                      | Dose route | PK parameters (unit)    | JQ1  | (6S+2S)-PEG0 | (6S+2S)-PEG7 | (6S+6S)-PEG7 | (6S+2S)-PEG1-pCN |
| 1                                                                                                                                                 | IV<br>N=3  | CL (L/hr/kg)            | 1.93 | 3.55         | 7.59         | 3.20         | 11.4             |
|                                                                                                                                                   |            | $V_{ss}$ (L/kg)         | 3.02 | 1.23         | 1.11         | 1.45         | 1.19             |
|                                                                                                                                                   |            | $AUC_{last}$ (hr*ng/mL) | 520  | 296          | 142          | 359          | 95.0             |
|                                                                                                                                                   |            | $AUC_{INF}$ (hr*ng/mL)  | 557  | 312          | 145          | 369          | 95.6             |
|                                                                                                                                                   |            | Terminal $t_{1/2}$ (hr) | 1.33 | 0.332        | 0.114        | 0.594        | 0.0834           |
|                                                                                                                                                   |            | $MRT_{INF}$ (hr)        | 1.67 | 0.386        | 0.156        | 0.532        | 0.104            |

**Supplementary Figure 6 | Pharmacokinetic analyses of bivalent inhibitors. (a, b)** Plasma pharmacokinetic analyses of bivalent molecules performed as 5-in-1 cassette dosing (4 bivalent molecules and JQ1). Five compounds (1 mg/kg) were administered intravenously to CD1 mice (n = 3).

**a**

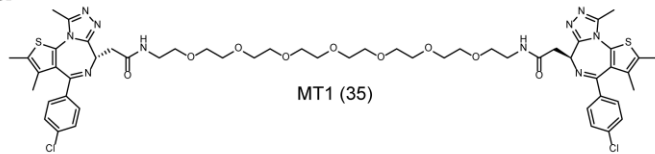

(6S+6S)-PEG7 (35) (50 mg/kg, IP)  
175 nM at 8 hour  
4 nM at 24 hour

| Individual and mean diluted blood concentration-time data of (6S+6S)-PEG7 after an IP dose at 50 mg/kg in male CD1 Mice |            |                    |                       |         |         |              |      |       |
|-------------------------------------------------------------------------------------------------------------------------|------------|--------------------|-----------------------|---------|---------|--------------|------|-------|
| Dose (mg/kg)                                                                                                            | Dose route | Sampling time (hr) | Concentration (ng/mL) |         |         | Mean (ng/mL) | SD   | CV(%) |
|                                                                                                                         |            |                    | Mouse#1               | Mouse#2 | Mouse#3 |              |      |       |
| 50                                                                                                                      | IP         | 0                  | BQL                   | BQL     | BQL     | BQL          | NA   | NA    |
|                                                                                                                         |            | 0.083              | 697                   | 2043    | 1141    | 1294         | 686  | 53.0  |
|                                                                                                                         |            | 0.25               | 3698                  | 6032    | 3778    | 4503         | 1325 | 29.4  |
|                                                                                                                         |            | 0.5                | 5543                  | 6956    | 5715    | 6071         | 771  | 12.7  |
|                                                                                                                         |            | 1                  | 5295                  | 6856    | 6009    | 6053         | 781  | 12.9  |
|                                                                                                                         |            | 2                  | 3745                  | 4390    | 3682    | 3939         | 392  | 9.95  |
|                                                                                                                         |            | 4                  | 2097                  | 905     | 358     | 1120         | 889  | 79.4  |
|                                                                                                                         |            | 8                  | 29.9                  | 461     | 104     | 198          | 231  | 116   |
|                                                                                                                         |            | 24                 | 4.65                  | 6.90    | 3.49    | 5.01         | 1.73 | 34.6  |
| PK parameters                                                                                                           |            | Unit               | Mouse#1               | Mouse#2 | Mouse#3 | Mean         | SD   | CV(%) |
| $T_{max}$                                                                                                               | hr         | 0.500              | 0.500                 | 1.00    | 0.667   | 0.289        | 43.3 |       |
| $C_{max}$                                                                                                               | ng/ml      | 5543               | 6956                  | 6009    | 6169    | 720          | 11.7 |       |
| Terminal $t_{1/2}$                                                                                                      | hr         | 2.26               | 2.78                  | 3.07    | 2.70    | 0.411        | 15.2 |       |
| $AUC_{last}$                                                                                                            | hr*ng/ml   | 19153              | 23231                 | 15243   | 19209   | 3994         | 20.8 |       |
| $AUC_{INF}$                                                                                                             | hr*ng/ml   | 19168              | 23259                 | 15259   | 19228   | 4000         | 20.8 |       |

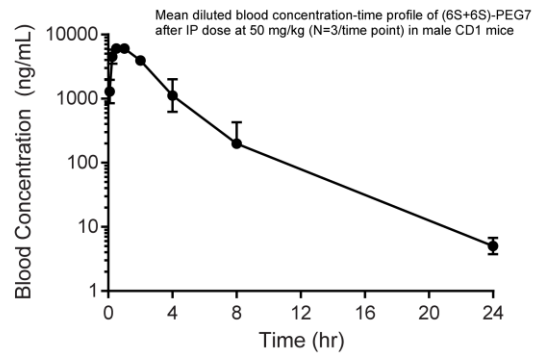

**b**

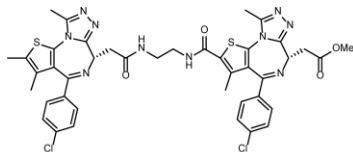

(6S+2S)-PEG0 (6) (50 mg/kg, IP)  
576 nM at 8 hour  
6 nM at 24 hour

| Individual and mean diluted blood concentration-time data of (6S+2S)-PEG0 after an IP dose at 50 mg/kg in male CD1 Mice |            |                    |                       |         |         |              |      |       |
|-------------------------------------------------------------------------------------------------------------------------|------------|--------------------|-----------------------|---------|---------|--------------|------|-------|
| Dose (mg/kg)                                                                                                            | Dose route | Sampling time (hr) | Concentration (ng/mL) |         |         | Mean (ng/mL) | SD   | CV(%) |
|                                                                                                                         |            |                    | Mouse#1               | Mouse#2 | Mouse#3 |              |      |       |
| 50                                                                                                                      | IP         | 0                  | BQL                   | BQL     | BQL     | BQL          | NA   | NA    |
|                                                                                                                         |            | 0.083              | 615                   | 1282    | 1243    | 1047         | 374  | 35.8  |
|                                                                                                                         |            | 0.25               | 4072                  | 3371    | 7055    | 4833         | 1956 | 40.5  |
|                                                                                                                         |            | 0.5                | 5570                  | 4692    | 5455    | 5239         | 477  | 9.11  |
|                                                                                                                         |            | 1                  | 4790                  | 3216    | 4643    | 4216         | 869  | 20.6  |
|                                                                                                                         |            | 2                  | 3183                  | 2799    | 4653    | 3545         | 979  | 27.6  |
|                                                                                                                         |            | 4                  | 3343                  | 1733    | 2759    | 2612         | 815  | 31.2  |
|                                                                                                                         |            | 8                  | 593                   | 281     | 630     | 501          | 192  | 38.3  |
|                                                                                                                         |            | 24                 | 6.28                  | 5.10    | 4.26    | 5.21         | 1.02 | 19.5  |
| PK parameters                                                                                                           |            | Unit               | Mouse#1               | Mouse#2 | Mouse#3 | Mean         | SD   | CV(%) |
| $T_{max}$                                                                                                               | hr         | 0.500              | 0.500                 | 0.250   | 0.417   | 0.144        | 34.6 |       |
| $C_{max}$                                                                                                               | ng/ml      | 5570               | 4692                  | 7055    | 5772    | 1194         | 20.7 |       |
| Terminal $t_{1/2}$                                                                                                      | hr         | 2.37               | 2.43                  | 2.17    | 2.32    | 0.137        | 5.92 |       |
| $AUC_{last}$                                                                                                            | hr*ng/ml   | 27391              | 17279                 | 28747   | 24472   | 6266         | 25.6 |       |
| $AUC_{INF}$                                                                                                             | hr*ng/ml   | 27412              | 17297                 | 28760   | 24490   | 6266         | 25.6 |       |

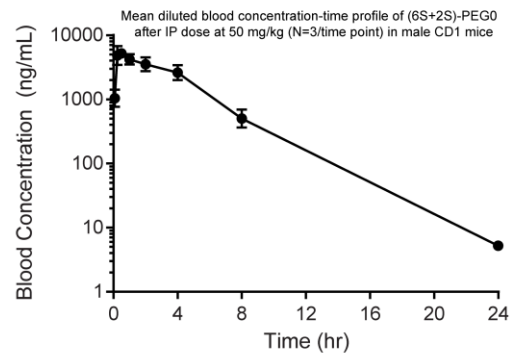

**Supplementary Figure 7 | Pharmacokinetic analysis of bivalent inhibitors. (a, b)** Plasma pharmacokinetic analyses of (a) (6S+2S)-PEG0 (50 mg/kg) and (b) (6S+6S)-PEG7 (50 mg/kg) administered intraperitoneally to CD1 mice (n = 3).



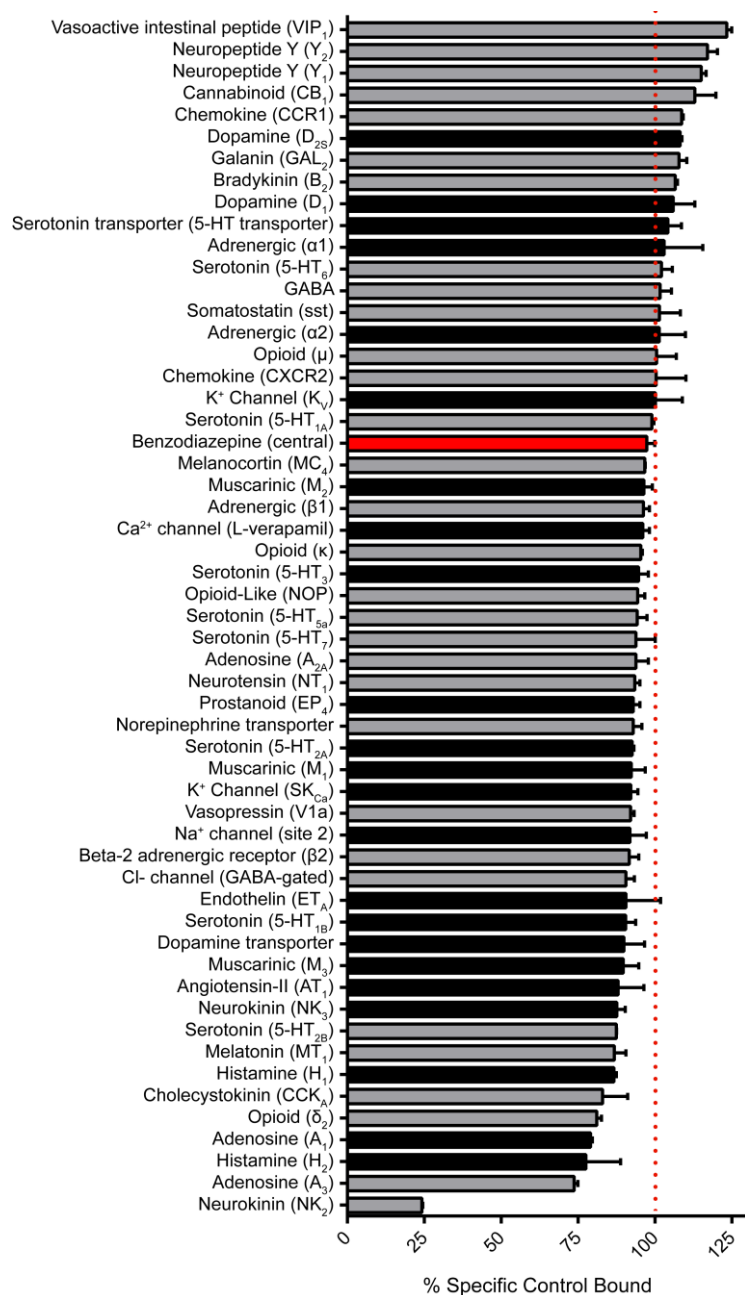

**Supplementary Figure 8 | MT1 exhibits limited activity against a panel of human recombinant ligand and ion receptors.** MT1 (1 μM) was screened against a panel of 55 ligand receptors, ion channels and transport proteins using an established and widely utilized commercial assay (ExpressProfile; CEREP). Competitive binding of MT1 against agonists (gray bars) and antagonists (black bars) of the indicated receptors, ion channels and transport proteins are depicted. Competitive binding of diazepam to the central benzodiazepine receptor is highlighted in red. Error bars represent the range of two independent measurements from the mean.

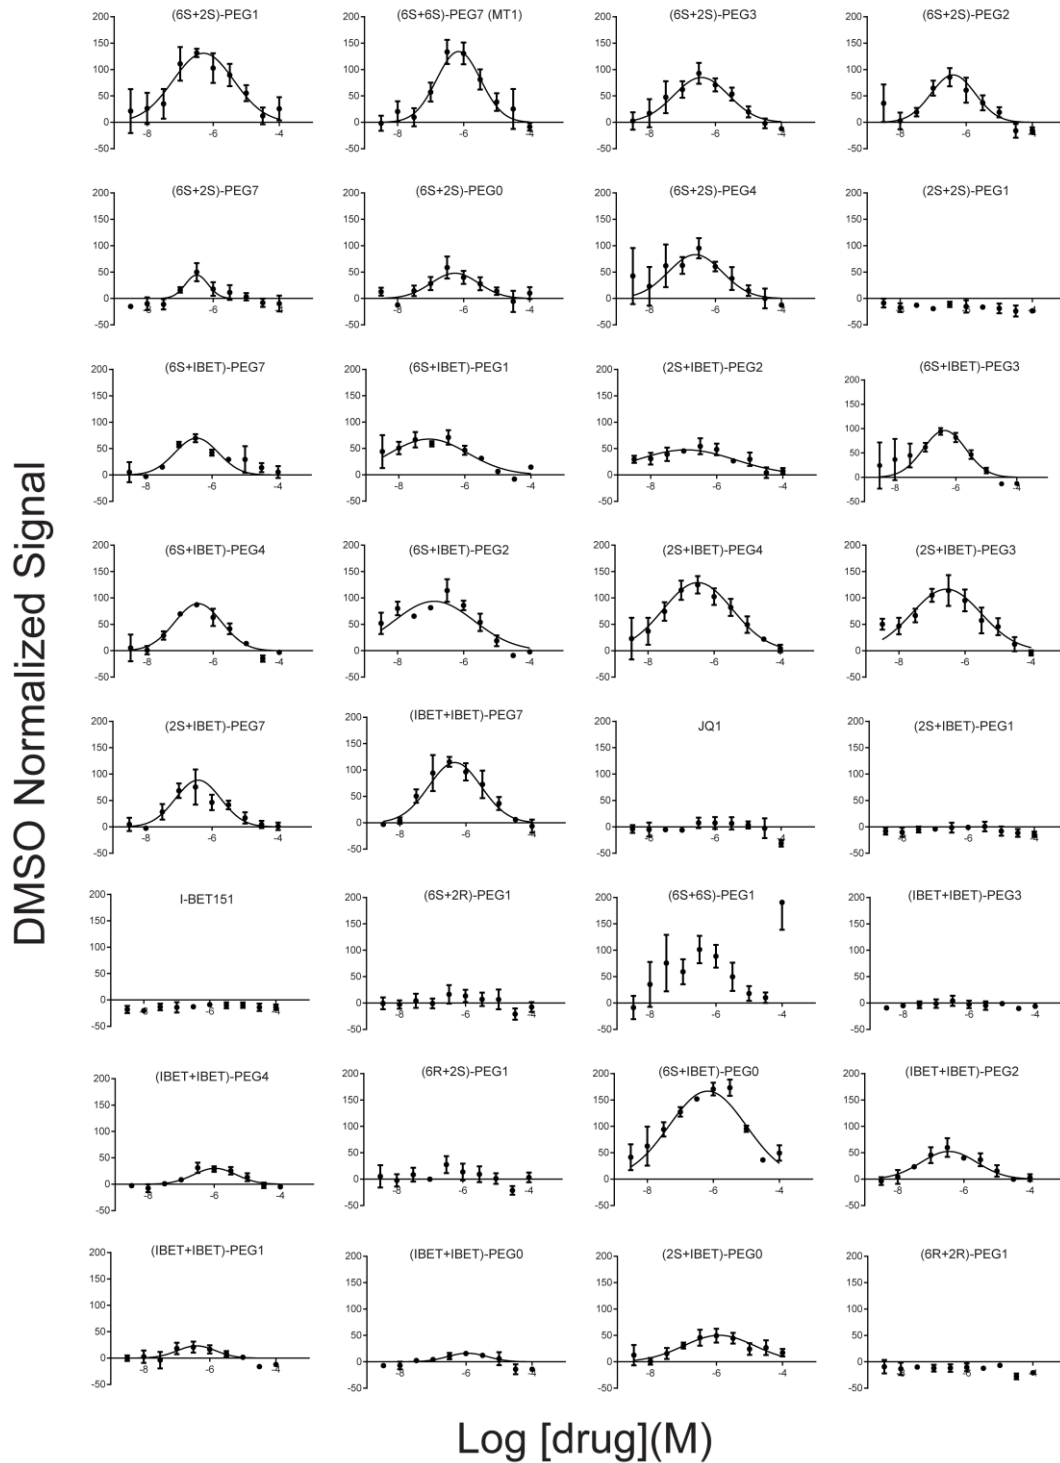

**Supplementary Figure 9 | BRD4(1) Dimerization Alpha.** Differentially tagged (His and GST) BRD4(1) constructs were incubated in the presence of drug and then glutathione donor and nickel acceptor AlphaScreen™ beads were added to the solution and luminescence was monitored to determine compound mediated dimerization. Data points are in triplicate and represent means  $\pm$  SD.

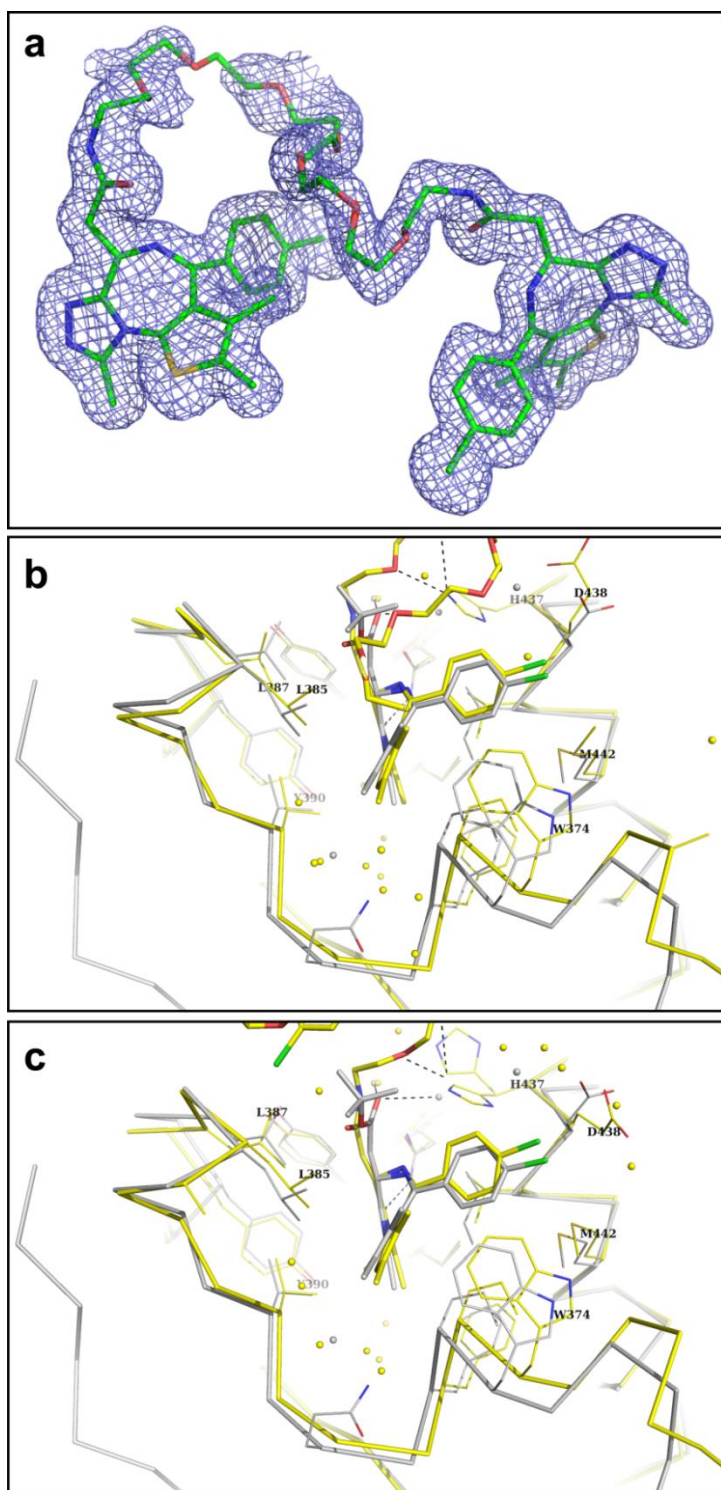

**Supplementary Figure 10 | Cocystal structures of MT1 with BRD4(2).** (a) An unbiased 2Fo - Fc electron density map around MT1 after the ligand was modeled with sigma level of 0.8. (b, c) Superpositions between the single binding mode of JQ1/BRD4(1) (PDB: 3MXF, gray) and the two binding modes of MT1 in each binding pocket of the two BRD4(2) (yellow) units crystallized.

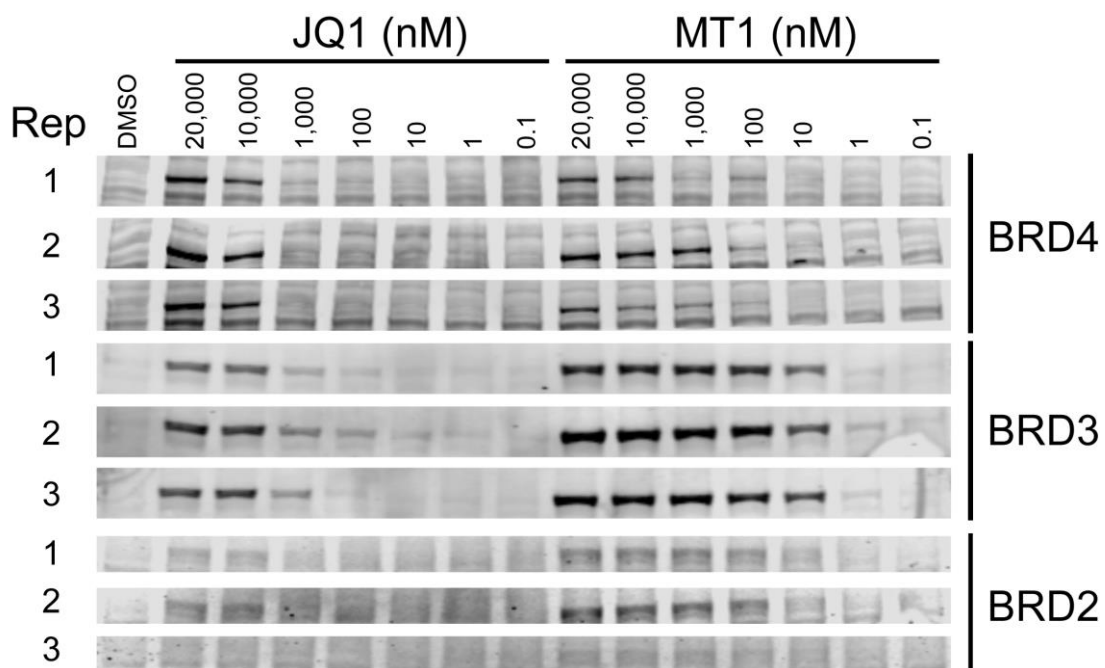

**Supplementary Figure 11 | CETSA of JQ1 and MT1.** MV4;11 cells were treated with JQ1, MT1, or DMSO and then subject to a heat shock to denature and aggregate proteins. Cells were lysed, clarified by centrifugation and stabilized protein in the supernatant was analyzed by SDS-PAGE and immunoblotting in technical triplicates. Full blots can be found in Supplementary Fig. 15.

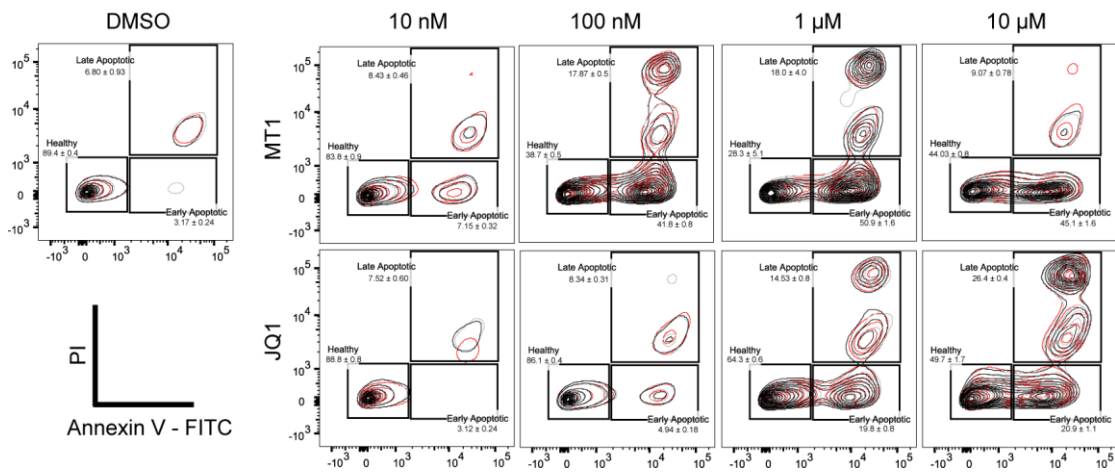

**Supplementary Figure 12 | Apoptotic advantage of MT1 over JQ1 by flow cytometry.** MV4;11 cells treated with either MT1, JQ1 or DMSO for 24 hours were analyzed for Annexin-V and propidium iodide staining by flow cytometry. Data are displayed as raw contour plots. Gating used here and in figure 5c is shown. Percentages are shown as the mean of three biological replicates  $\pm$  SD.

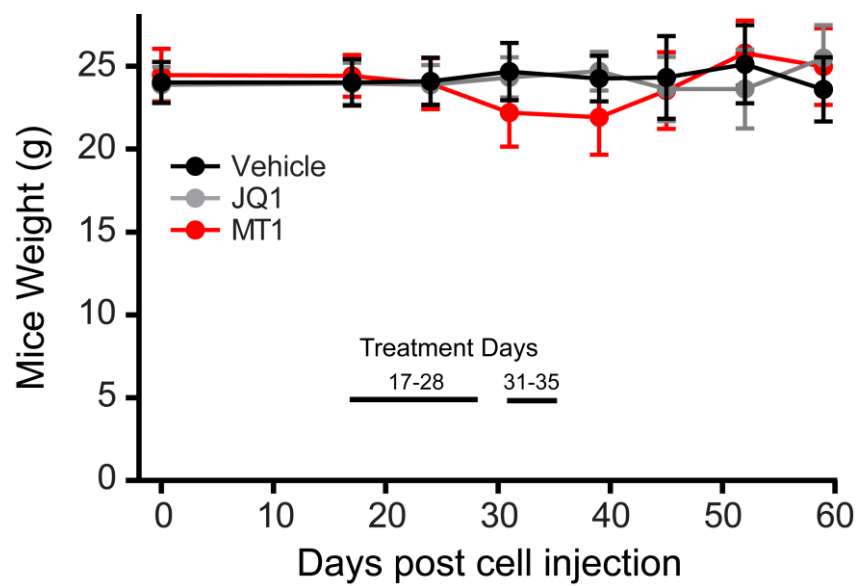

**Supplementary Figure 13 | Tolerability/toxicity of MT1.** In a xenograft model of disseminated leukemia (MV4;11), mice were treated with vehicle (n=11), JQ1 (n=11), or MT1 (n=11) at 44  $\mu$ mol/kg for the indicated days. Mice were weighed at the indicated times points. Data points represent means  $\pm$  SD.

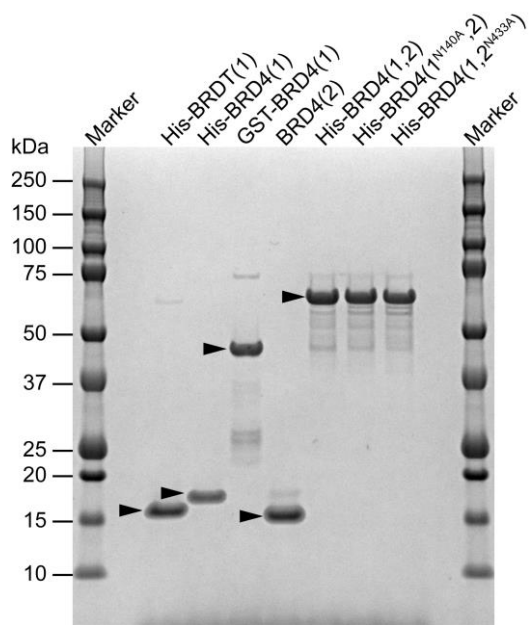

**Supplementary Figure 14 | Purified proteins gel.** 2  $\mu$ g of each recombinant protein used in this study were run on an SDS-PAGE gel and then stained with Coomassie blue stain. Arrows indicate the major desired protein band.

Fig. 3c

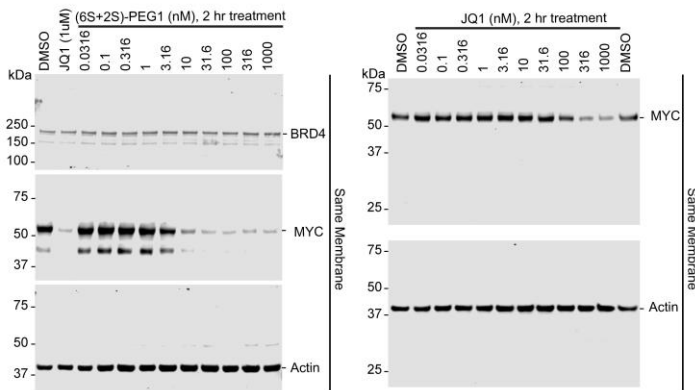

Fig. 3d

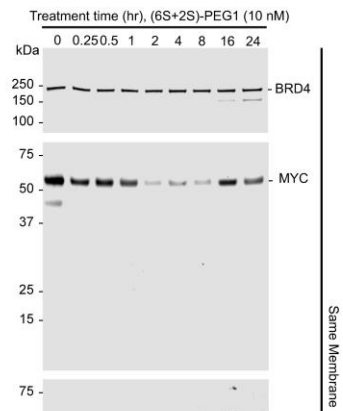

Fig. 5b

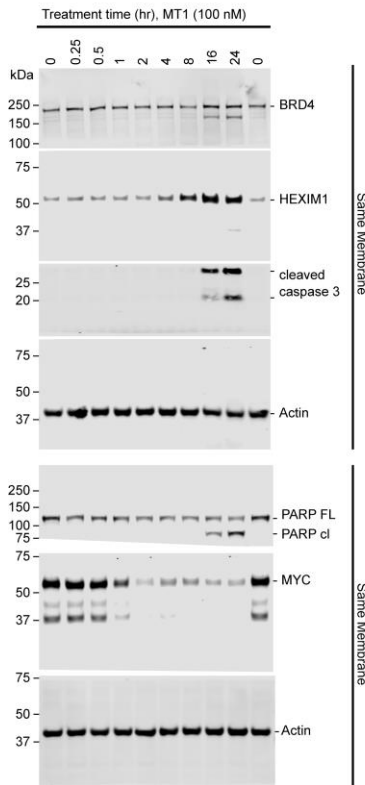

Supplementary Fig. 11

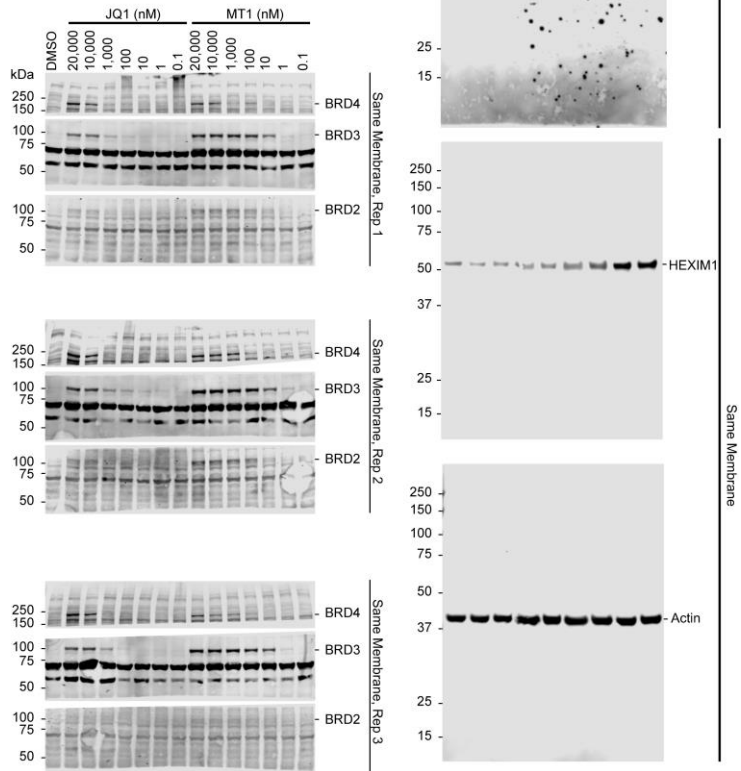

Supplementary Figure 15 | Full western blots from figures 3c, 3d, 5b , and supplementary figure 11. Doses and time points are indicated above blots. For each blot a loading control from the same membrane has been included. For the CETSA experiment from supplementary figure 11 there are no loading controls.



**Supplementary Table 1 | Potency of dimeric compounds for BET family bromodomains.**

| DiscoverX Gene Symbol          | Kd (nM) |              |        |
|--------------------------------|---------|--------------|--------|
|                                | (+)-JQ1 | (6S+2S)-PEG1 | MT1    |
| BRD2(1)                        | 27      | 0.014        | 0.16   |
| BRD2(2)                        | 18      | 0.0069       | 0.033  |
| BRD2(1,2)                      | 5.6     | 0.01         | 0.024  |
| BRD3(1)                        | 14      | 0.13         | 0.059  |
| BRD3(2)                        | 19      | 0.0027       | 0.07   |
| BRD3(1,2)                      | 14      | 0.11         | 0.012  |
| BRD4(1)                        | 14      | 0.18         | 0.099  |
| BRD4(2)                        | 8.2     | 0.0043       | 0.053  |
| BRD4(1,2)                      | 7.3     | 0.012        | 0.087  |
| BRD4 (full-length, short-iso.) | 11      | 0.0078       | 0.062  |
| BRDT(1)                        | 47      | 0.29         | 0.56   |
| BRDT(2)                        | 35      | 0.066        | 0.086  |
| BRDT(1,2)                      | 46      | 0.42         | 0.076  |
| All others                     | ≥24,000 | ≥2,500       | ≥1,800 |

**Supplementary Table 2 | Data collection and refinement statistics (molecular replacement).**

| BRD4(2)/MT1 (5JWM)                 |                              |
|------------------------------------|------------------------------|
| <b>Data collection</b>             |                              |
| Space group                        | C 2 2 21                     |
| Cell dimensions                    |                              |
| <i>a</i> , <i>b</i> , <i>c</i> (Å) | 75.67, 107.14, 74.84         |
| $\alpha$ , $\beta$ , $\gamma$ (°)  | 90.0, 90.0, 90.0             |
| Resolution (Å)                     | 43.56 – 1.71 (1.771 – 1.71)* |
| <i>R</i> <sub>merge</sub>          | 0.0459 (0.662)               |
| <i>I</i> / $\sigma I$              | 16.8 (2.3)                   |
| Completeness (%)                   | 99.2 (99.5)                  |
| Redundancy                         | 3.6 (3.7)                    |
| <b>Refinement</b>                  |                              |
| Resolution (Å)                     | 43.56 – 1.71 (1.771 – 1.71)  |
| No. reflections                    | 32877 (3274)                 |
| Rwork / Rfree                      | 0.1498 / 0.1759              |
| No. atoms                          |                              |
| Protein                            | 1761                         |
| Ligand/ion                         | 77                           |
| Water                              | 204                          |
| B-factors                          |                              |
| Protein                            | 30.3                         |
| Ligand/ion                         | 36.2                         |
| Water                              | 40.2                         |
| R.m.s. deviations                  |                              |
| Bond lengths (Å)                   | 0.005                        |
| Bond angles (°)                    | 0.78                         |

Data were collected on a single crystal that led to this structure.

\*Values in parentheses are for highest-resolution shell.
